# Supplementary material for: Determination of RNA polymerase binding surfaces of transcription factors by NMR spectroscopy
Source: PubMed Central journal article supplement (PMC4642336; doi:10.1038/srep16428), 2015-11-12
Supplement: srep16428-s1.pdf [file srep16428-s1.pdf]

## Supplementary Information

### Determination of RNA polymerase binding surfaces of transcription factors by NMR spectroscopy

Johanna Drögemüller<sup>1,§</sup>, Martin Strauß<sup>1,§</sup>, Kristian Schweimer<sup>1</sup>, Marcel Jurk<sup>2</sup>, Paul Rösch<sup>1</sup>,  
Stefan H Knauer<sup>1,\*</sup>

<sup>1</sup> Lehrstuhl Biopolymere und Forschungszentrum für Bio-Makromoleküle, Universität Bayreuth, Universitätsstraße 30, 95447 Bayreuth, Germany

<sup>2</sup> present address: Max Planck Institute for Molecular Genetics, Ihnestr. 63-73, 14195 Berlin, Germany

§ These authors contributed equally to this work

\* corresponding author

#### Contents

|                                 |           |
|---------------------------------|-----------|
| <b>Supplementary Table 1</b>    | <b>2</b>  |
| <b>Supplementary Figure 1</b>   | <b>4</b>  |
| <b>Supplementary Figure 2</b>   | <b>5</b>  |
| <b>Supplementary Figure 3</b>   | <b>6</b>  |
| <b>Supplementary Figure 4</b>   | <b>7</b>  |
| <b>Supplementary Figure 5</b>   | <b>8</b>  |
| <b>Supplementary References</b> | <b>10</b> |

**Supplementary Table 1: Coordinates of the  $\beta$  flap tip helix in the modeled NusA-NTD<sup>A</sup>:*Tt*RNAP complex.** The table is an extract of the PDB file of elongating *Tt*RNAP (residues 767-781 of the  $\beta$  subunit; PDB ID: 2O5I) docked to NusA-NTD<sup>A</sup> as described in the Material and Methods section, giving the position of *Tt*RNAP relative to the deposited coordinates of NusA-NTD<sup>A</sup> (PDB ID: 2KWP).

|      |       |     |     |   |     |        |        |         |      |       |   |
|------|-------|-----|-----|---|-----|--------|--------|---------|------|-------|---|
| ATOM | 10777 | N   | PRO | C | 767 | 3.453  | -1.849 | -42.571 | 1.00 | 90.52 | N |
| ATOM | 10778 | CA  | PRO | C | 767 | 2.398  | -2.073 | -41.584 | 1.00 | 91.06 | C |
| ATOM | 10779 | C   | PRO | C | 767 | 2.633  | -1.165 | -40.362 | 1.00 | 92.21 | C |
| ATOM | 10780 | O   | PRO | C | 767 | 3.412  | -0.213 | -40.472 | 1.00 | 92.68 | O |
| ATOM | 10781 | CB  | PRO | C | 767 | 2.524  | -3.559 | -41.274 | 1.00 | 90.38 | C |
| ATOM | 10782 | CG  | PRO | C | 767 | 3.028  | -4.129 | -42.533 | 1.00 | 90.03 | C |
| ATOM | 10783 | CD  | PRO | C | 767 | 4.098  | -3.134 | -42.897 | 1.00 | 90.44 | C |
| ATOM | 10784 | N   | THR | C | 768 | 2.013  | -1.418 | -39.212 | 1.00 | 92.37 | N |
| ATOM | 10785 | CA  | THR | C | 768 | 2.261  | -0.517 | -38.082 | 1.00 | 93.42 | C |
| ATOM | 10786 | C   | THR | C | 768 | 2.739  | -1.281 | -36.849 | 1.00 | 94.34 | C |
| ATOM | 10787 | O   | THR | C | 768 | 2.104  | -2.254 | -36.442 | 1.00 | 94.97 | O |
| ATOM | 10788 | CB  | THR | C | 768 | 0.994  | 0.286  | -37.704 | 1.00 | 92.74 | C |
| ATOM | 10789 | OG1 | THR | C | 768 | 0.329  | 0.726  | -38.894 | 1.00 | 92.51 | O |
| ATOM | 10790 | CG2 | THR | C | 768 | 1.369  | 1.533  | -36.866 | 1.00 | 91.14 | C |
| ATOM | 10791 | N   | PRO | C | 769 | 3.867  | -0.844 | -36.239 | 1.00 | 95.40 | N |
| ATOM | 10792 | CA  | PRO | C | 769 | 4.475  | -1.458 | -35.040 | 1.00 | 95.44 | C |
| ATOM | 10793 | C   | PRO | C | 769 | 3.577  | -1.368 | -33.769 | 1.00 | 95.51 | C |
| ATOM | 10794 | O   | PRO | C | 769 | 3.583  | -2.294 | -32.943 | 1.00 | 95.59 | O |
| ATOM | 10795 | CB  | PRO | C | 769 | 5.803  | -0.706 | -34.892 | 1.00 | 96.45 | C |
| ATOM | 10796 | CG  | PRO | C | 769 | 6.147  | -0.342 | -36.332 | 1.00 | 95.78 | C |
| ATOM | 10797 | CD  | PRO | C | 769 | 4.806  | 0.125  | -36.849 | 1.00 | 95.78 | C |
| ATOM | 10798 | N   | GLU | C | 770 | 2.827  | -0.273 | -33.609 | 1.00 | 93.98 | N |
| ATOM | 10799 | CA  | GLU | C | 770 | 1.962  | -0.077 | -32.434 | 1.00 | 93.34 | C |
| ATOM | 10800 | C   | GLU | C | 770 | 0.563  | -0.681 | -32.666 | 1.00 | 93.16 | C |
| ATOM | 10801 | O   | GLU | C | 770 | -0.118 | -1.081 | -31.718 | 1.00 | 92.30 | O |
| ATOM | 10802 | CB  | GLU | C | 770 | 1.849  | 1.427  | -32.127 | 1.00 | 92.37 | C |
| ATOM | 10803 | CG  | GLU | C | 770 | 3.152  | 2.249  | -32.385 | 1.00 | 90.19 | C |
| ATOM | 10804 | CD  | GLU | C | 770 | 3.957  | 2.594  | -31.128 | 1.00 | 88.39 | C |
| ATOM | 10805 | OE1 | GLU | C | 770 | 4.437  | 1.679  | -30.437 | 1.00 | 87.21 | O |
| ATOM | 10806 | OE2 | GLU | C | 770 | 4.113  | 3.798  | -30.832 | 1.00 | 87.50 | O |
| ATOM | 10807 | N   | GLU | C | 771 | 0.159  | -0.730 | -33.938 | 1.00 | 93.66 | N |
| ATOM | 10808 | CA  | GLU | C | 771 | -1.116 | -1.314 | -34.376 | 1.00 | 95.22 | C |
| ATOM | 10809 | C   | GLU | C | 771 | -0.991 | -2.838 | -34.494 | 1.00 | 96.29 | C |
| ATOM | 10810 | O   | GLU | C | 771 | -1.993 | -3.557 | -34.560 | 1.00 | 96.81 | O |
| ATOM | 10811 | CB  | GLU | C | 771 | -1.531 | -0.719 | -35.743 | 1.00 | 95.59 | C |
| ATOM | 10812 | CG  | GLU | C | 771 | -2.798 | -1.302 | -36.423 | 1.00 | 95.80 | C |
| ATOM | 10813 | CD  | GLU | C | 771 | -2.986 | -0.867 | -37.893 | 1.00 | 96.05 | C |
| ATOM | 10814 | OE1 | GLU | C | 771 | -4.129 | -0.944 | -38.403 | 1.00 | 95.71 | O |
| ATOM | 10815 | OE2 | GLU | C | 771 | -1.999 | -0.457 | -38.544 | 1.00 | 95.66 | O |
| ATOM | 10816 | N   | ARG | C | 772 | 0.255  | -3.318 | -34.526 | 1.00 | 95.94 | N |
| ATOM | 10817 | CA  | ARG | C | 772 | 0.562  | -4.755 | -34.598 | 1.00 | 96.21 | C |
| ATOM | 10818 | C   | ARG | C | 772 | 0.310  | -5.431 | -33.247 | 1.00 | 97.11 | C |
| ATOM | 10819 | O   | ARG | C | 772 | -0.155 | -6.577 | -33.193 | 1.00 | 97.59 | O |
| ATOM | 10820 | CB  | ARG | C | 772 | 2.031  | -4.975 | -34.992 | 1.00 | 94.95 | C |
| ATOM | 10821 | CG  | ARG | C | 772 | 2.497  | -6.441 | -35.071 | 1.00 | 92.48 | C |
| ATOM | 10822 | CD  | ARG | C | 772 | 1.926  | -7.149 | -36.290 | 1.00 | 91.56 | C |
| ATOM | 10823 | NE  | ARG | C | 772 | 1.943  | -6.309 | -37.490 | 1.00 | 90.45 | N |
| ATOM | 10824 | CZ  | ARG | C | 772 | 1.929  | -6.773 | -38.739 | 1.00 | 90.61 | C |
| ATOM | 10825 | NH1 | ARG | C | 772 | 1.906  | -8.079 | -38.978 | 1.00 | 91.27 | N |
| ATOM | 10826 | NH2 | ARG | C | 772 | 1.936  | -5.935 | -39.759 | 1.00 | 89.96 | N |
| ATOM | 10827 | N   | LEU | C | 773 | 0.629  | -4.710 | -32.164 | 1.00 | 97.02 | N |
| ATOM | 10828 | CA  | LEU | C | 773 | 0.423  | -5.199 | -30.800 | 1.00 | 97.16 | C |
| ATOM | 10829 | C   | LEU | C | 773 | -1.069 | -5.199 | -30.435 | 1.00 | 96.83 | C |
| ATOM | 10830 | O   | LEU | C | 773 | -1.557 | -6.174 | -29.874 | 1.00 | 97.78 | O |
| ATOM | 10831 | CB  | LEU | C | 773 | 1.212  | -4.334 | -29.791 | 1.00 | 96.99 | C |
| ATOM | 10832 | CG  | LEU | C | 773 | 2.759  | -4.388 | -29.822 | 1.00 | 96.94 | C |

|      |       |     |     |   |     |         |         |         |      |       |   |
|------|-------|-----|-----|---|-----|---------|---------|---------|------|-------|---|
| ATOM | 10833 | CD1 | LEU | C | 773 | 3.329   | -3.401  | -28.800 | 1.00 | 96.92 | C |
| ATOM | 10834 | CD2 | LEU | C | 773 | 3.246   | -5.800  | -29.502 | 1.00 | 97.02 | C |
| ATOM | 10835 | N   | LEU | C | 774 | -1.789  | -4.120  | -30.755 | 1.00 | 95.96 | N |
| ATOM | 10836 | CA  | LEU | C | 774 | -3.229  | -4.033  | -30.473 | 1.00 | 95.46 | C |
| ATOM | 10837 | C   | LEU | C | 774 | -3.998  | -5.145  | -31.174 | 1.00 | 95.47 | C |
| ATOM | 10838 | O   | LEU | C | 774 | -4.830  | -5.817  | -30.562 | 1.00 | 96.22 | O |
| ATOM | 10839 | CB  | LEU | C | 774 | -3.806  | -2.692  | -30.942 | 1.00 | 93.90 | C |
| ATOM | 10840 | CG  | LEU | C | 774 | -5.346  | -2.636  | -30.934 | 1.00 | 92.29 | C |
| ATOM | 10841 | CD1 | LEU | C | 774 | -5.830  | -2.770  | -29.504 | 1.00 | 91.81 | C |
| ATOM | 10842 | CD2 | LEU | C | 774 | -5.833  | -1.345  | -31.545 | 1.00 | 91.22 | C |
| ATOM | 10843 | N   | ARG | C | 775 | -3.735  | -5.325  | -32.462 | 1.00 | 95.29 | N |
| ATOM | 10844 | CA  | ARG | C | 775 | -4.402  | -6.381  | -33.208 | 1.00 | 94.68 | C |
| ATOM | 10845 | C   | ARG | C | 775 | -4.209  | -7.740  | -32.520 | 1.00 | 94.67 | C |
| ATOM | 10846 | O   | ARG | C | 775 | -5.184  | -8.404  | -32.214 | 1.00 | 94.44 | O |
| ATOM | 10847 | CB  | ARG | C | 775 | -3.860  | -6.445  | -34.654 | 1.00 | 94.56 | C |
| ATOM | 10848 | CG  | ARG | C | 775 | -4.360  | -5.341  | -35.613 | 1.00 | 92.12 | C |
| ATOM | 10849 | CD  | ARG | C | 775 | -5.880  | -5.356  | -35.749 | 1.00 | 90.64 | C |
| ATOM | 10850 | NE  | ARG | C | 775 | -6.342  | -4.568  | -36.888 | 1.00 | 89.53 | N |
| ATOM | 10851 | CZ  | ARG | C | 775 | -7.616  | -4.420  | -37.234 | 1.00 | 88.70 | C |
| ATOM | 10852 | NH1 | ARG | C | 775 | -8.567  | -5.009  | -36.526 | 1.00 | 88.08 | N |
| ATOM | 10853 | NH2 | ARG | C | 775 | -7.937  | -3.684  | -38.292 | 1.00 | 88.26 | N |
| ATOM | 10854 | N   | SER | C | 776 | -2.950  | -8.120  | -32.264 | 1.00 | 94.65 | N |
| ATOM | 10855 | CA  | SER | C | 776 | -2.568  | -9.411  | -31.644 | 1.00 | 94.82 | C |
| ATOM | 10856 | C   | SER | C | 776 | -3.212  | -9.627  | -30.236 | 1.00 | 94.23 | C |
| ATOM | 10857 | O   | SER | C | 776 | -3.590  | -10.761 | -29.910 | 1.00 | 94.33 | O |
| ATOM | 10858 | CB  | SER | C | 776 | -1.021  | -9.512  | -31.521 | 1.00 | 94.77 | C |
| ATOM | 10859 | OG  | SER | C | 776 | -0.360  | -9.645  | -32.780 | 1.00 | 94.97 | O |
| ATOM | 10860 | N   | ILE | C | 777 | -3.334  | -8.580  | -29.415 | 1.00 | 93.70 | N |
| ATOM | 10861 | CA  | ILE | C | 777 | -3.901  | -8.698  | -28.057 | 1.00 | 92.75 | C |
| ATOM | 10862 | C   | ILE | C | 777 | -5.350  | -9.252  | -28.072 | 1.00 | 93.16 | C |
| ATOM | 10863 | O   | ILE | C | 777 | -5.631  | -10.255 | -27.404 | 1.00 | 93.55 | O |
| ATOM | 10864 | CB  | ILE | C | 777 | -3.896  | -7.308  | -27.305 | 1.00 | 92.10 | C |
| ATOM | 10865 | CG1 | ILE | C | 777 | -2.455  | -6.821  | -27.095 | 1.00 | 91.21 | C |
| ATOM | 10866 | CG2 | ILE | C | 777 | -4.534  | -7.449  | -25.920 | 1.00 | 91.63 | C |
| ATOM | 10867 | CD1 | ILE | C | 777 | -2.357  | -5.456  | -26.433 | 1.00 | 90.12 | C |
| ATOM | 10868 | N   | PHE | C | 778 | -6.256  | -8.615  | -28.820 | 1.00 | 93.48 | N |
| ATOM | 10869 | CA  | PHE | C | 778 | -7.673  | -9.029  | -28.887 | 1.00 | 93.33 | C |
| ATOM | 10870 | C   | PHE | C | 778 | -7.928  | -10.029 | -30.029 | 1.00 | 94.16 | C |
| ATOM | 10871 | O   | PHE | C | 778 | -8.818  | -10.872 | -29.934 | 1.00 | 93.84 | O |
| ATOM | 10872 | CB  | PHE | C | 778 | -8.583  | -7.804  | -29.105 | 1.00 | 92.40 | C |
| ATOM | 10873 | CG  | PHE | C | 778 | -8.687  | -6.861  | -27.918 | 1.00 | 91.76 | C |
| ATOM | 10874 | CD1 | PHE | C | 778 | -7.540  | -6.454  | -27.198 | 1.00 | 91.29 | C |
| ATOM | 10875 | CD2 | PHE | C | 778 | -9.943  | -6.350  | -27.533 | 1.00 | 91.20 | C |
| ATOM | 10876 | CE1 | PHE | C | 778 | -7.638  | -5.546  | -26.104 | 1.00 | 90.92 | C |
| ATOM | 10877 | CE2 | PHE | C | 778 | -10.067 | -5.440  | -26.441 | 1.00 | 91.24 | C |
| ATOM | 10878 | CZ  | PHE | C | 778 | -8.906  | -5.037  | -25.723 | 1.00 | 90.85 | C |
| ATOM | 10879 | N   | GLY | C | 779 | -7.153  | -9.925  | -31.108 | 1.00 | 95.41 | N |
| ATOM | 10880 | CA  | GLY | C | 779 | -7.313  | -10.826 | -32.242 | 1.00 | 97.01 | C |
| ATOM | 10881 | C   | GLY | C | 779 | -6.406  | -10.473 | -33.421 | 1.00 | 97.94 | C |
| ATOM | 10882 | O   | GLY | C | 779 | -6.809  | -9.697  | -34.309 | 1.00 | 98.21 | O |
| ATOM | 10883 | N   | GLU | C | 780 | -5.190  | -11.038 | -33.414 | 1.00 | 98.62 | N |
| ATOM | 10884 | CA  | GLU | C | 780 | -4.154  | -10.817 | -34.448 | 1.00 | 98.20 | C |
| ATOM | 10885 | C   | GLU | C | 780 | -4.735  | -10.916 | -35.859 | 1.00 | 97.77 | C |
| ATOM | 10886 | O   | GLU | C | 780 | -4.483  | -10.050 | -36.707 | 1.00 | 97.44 | O |
| ATOM | 10887 | CB  | GLU | C | 780 | -3.002  | -11.842 | -34.299 | 1.00 | 98.74 | C |
| ATOM | 10888 | CG  | GLU | C | 780 | -3.479  | -13.315 | -34.185 | 1.00 | 98.09 | C |
| ATOM | 10889 | CD  | GLU | C | 780 | -2.821  | -14.257 | -35.186 | 1.00 | 97.77 | C |
| ATOM | 10890 | OE1 | GLU | C | 780 | -3.289  | -15.415 | -35.292 | 1.00 | 97.28 | O |
| ATOM | 10891 | OE2 | GLU | C | 780 | -1.848  | -13.846 | -35.859 | 1.00 | 97.54 | O |
| ATOM | 10892 | N   | LYS | C | 781 | -5.507  | -11.978 | -36.099 | 1.00 | 97.33 | N |
| ATOM | 10893 | CA  | LYS | C | 781 | -6.147  | -12.202 | -37.392 | 1.00 | 96.31 | C |
| ATOM | 10894 | C   | LYS | C | 781 | -7.292  | -11.208 | -37.620 | 1.00 | 95.87 | C |
| ATOM | 10895 | O   | LYS | C | 781 | -8.485  | -11.533 | -37.511 | 1.00 | 96.54 | O |
| ATOM | 10896 | CB  | LYS | C | 781 | -6.675  | -13.642 | -37.491 | 1.00 | 95.28 | C |
| ATOM | 10897 | CG  | LYS | C | 781 | -7.331  | -14.173 | -36.226 | 1.00 | 93.86 | C |
| ATOM | 10898 | CD  | LYS | C | 781 | -8.176  | -15.409 | -36.492 | 1.00 | 93.01 | C |
| ATOM | 10899 | CE  | LYS | C | 781 | -7.389  | -16.500 | -37.197 | 1.00 | 92.99 | C |
| ATOM | 10900 | NZ  | LYS | C | 781 | -6.056  | -16.712 | -36.568 | 1.00 | 93.33 | N |

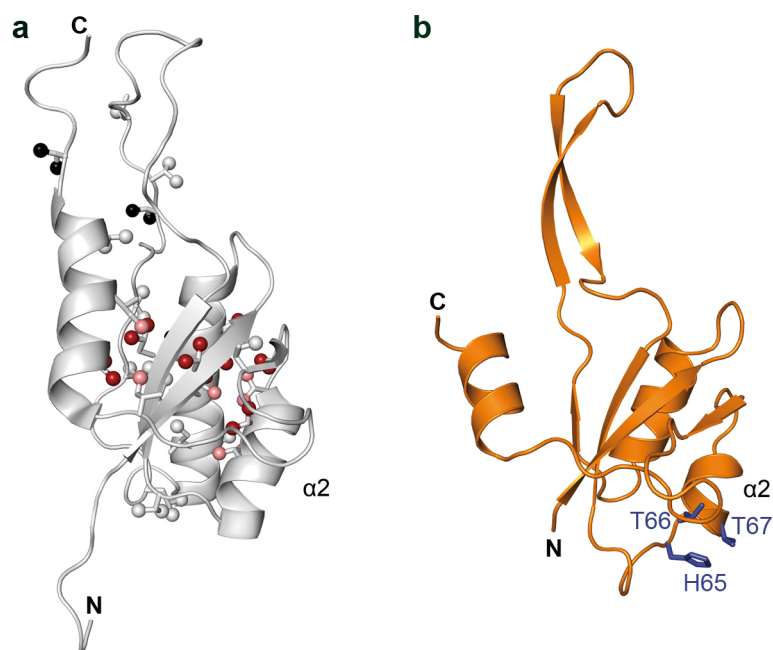

**Supplementary Figure 1: Structures of NusG-NTD and RfaH-NTD.** (a) RNAP binding site of NusG-NTD. Structure of NusG-NTD (PDB ID: 2K06) in cartoon representation, grey. Ile, Leu, and Val residues are shown as sticks with the carbon atoms of their methyl groups represented as spheres. Strongly affected methyl groups, dark red; slightly affected methyl groups, light red; unaffected methyl groups, grey; unassigned methyl groups, black. (b)  $\beta$ GL binding motif of RfaH-NTD. Structure of RfaH-NTD (PDB ID: 2OUG) in cartoon representation, orange. Residues involved in  $\beta$ GL binding are shown as blue sticks and labeled.

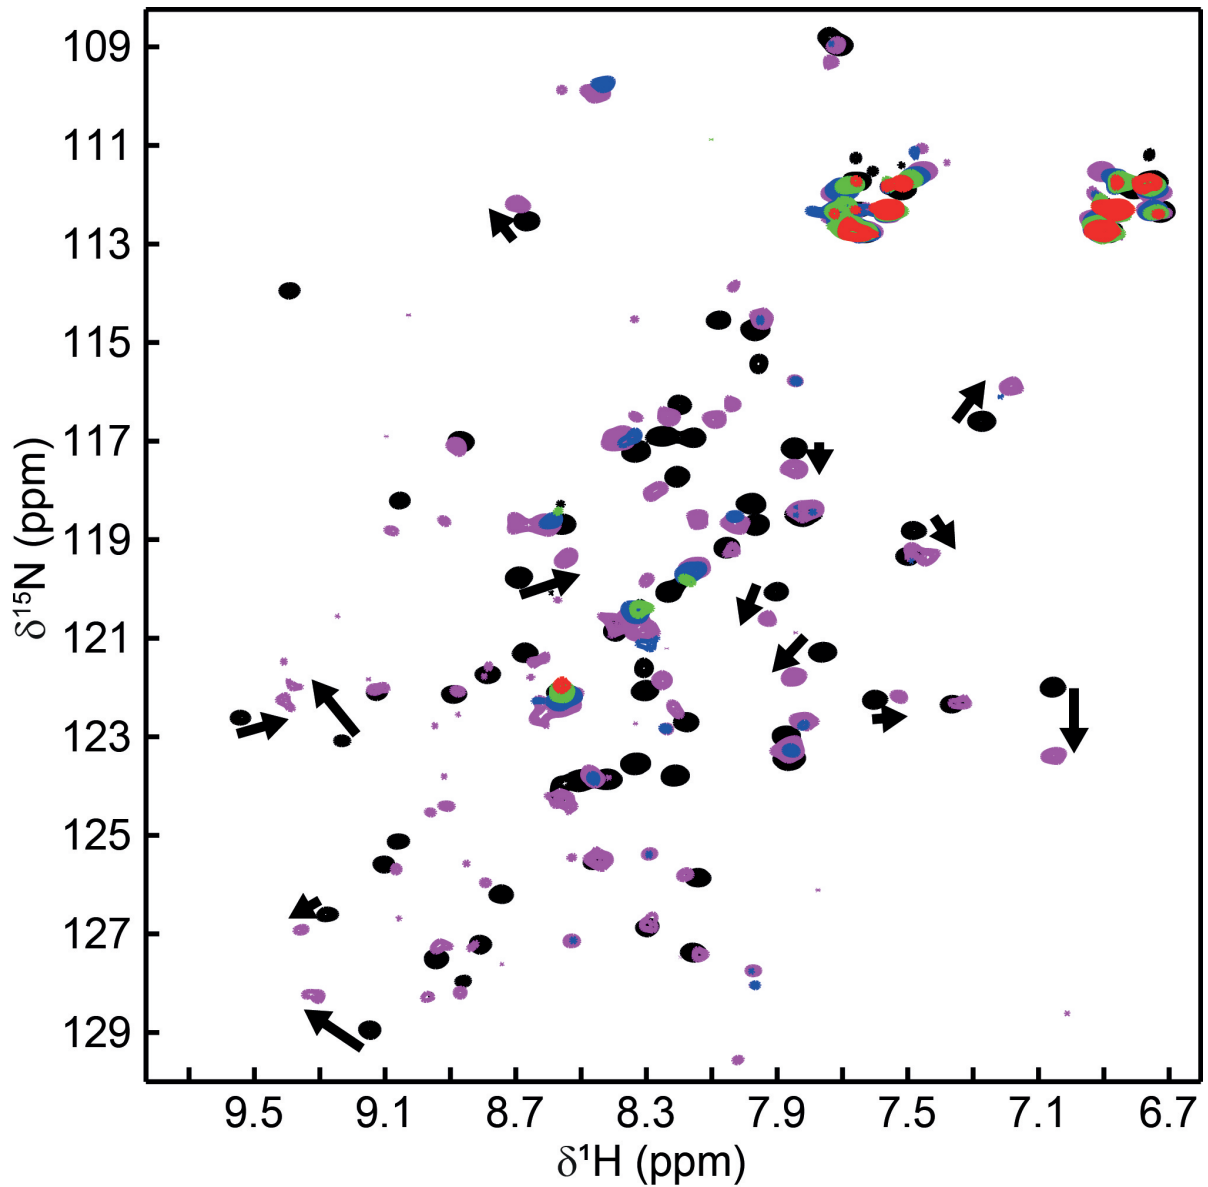

**Supplementary Figure 2: Displacement of RNAP from NusE $^{\Delta}$  by NusG-CTD.** 2D [ $^1\text{H}$ ,  $^{15}\text{N}$ ]-HSQC spectra of free NusB:[ $^{15}\text{N}$ ]-NusE $^{\Delta}$ , black, NusB:[ $^{15}\text{N}$ ]-NusE $^{\Delta}$  in the presence of RNAP in equimolar concentration, red, and NusB:[ $^{15}\text{N}$ ]-NusE $^{\Delta}$  in the presence of RNAP and NusG-CTD (molar ratio 1:1:1, green; 1:1:3, blue; 1:1:10, purple). Black arrows indicate the chemical shift changes that occur upon complex formation of NusG-CTD and NusB:[ $^{15}\text{N}$ ]-NusE $^{\Delta}$ .

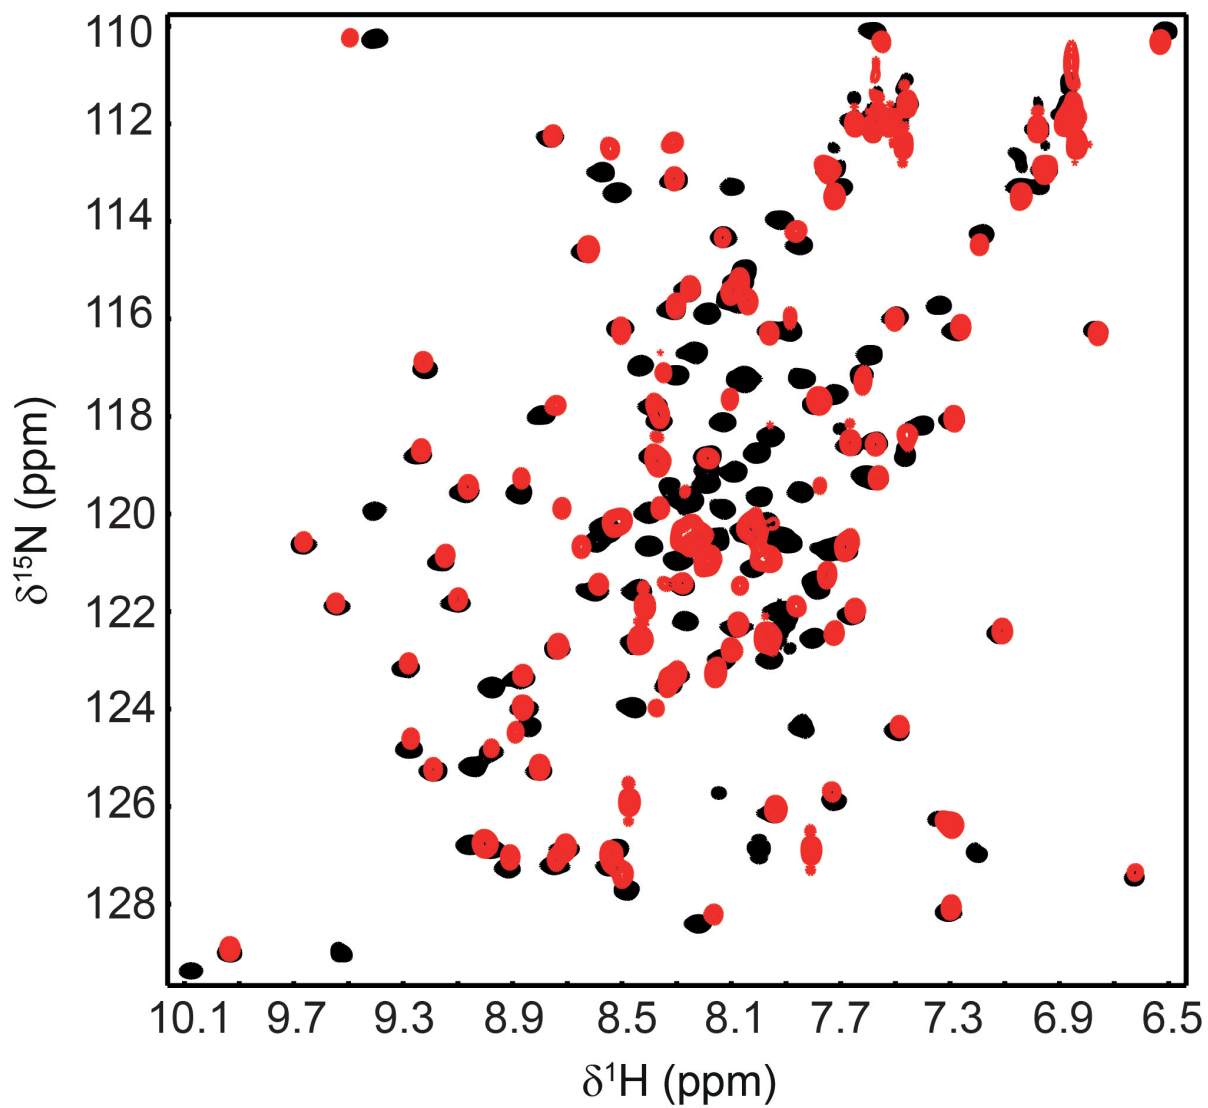

**Supplementary Figure 3: Superposition of the  $[^1\text{H},^{15}\text{N}]$ -HSQC spectra of  $[^{15}\text{N}]$ -NusA-NTD(1-137), red, and  $[^{15}\text{N}]$ -NusA-NTD<sup>A</sup>, black. The protein concentration was 400  $\mu\text{M}$  in each sample.**

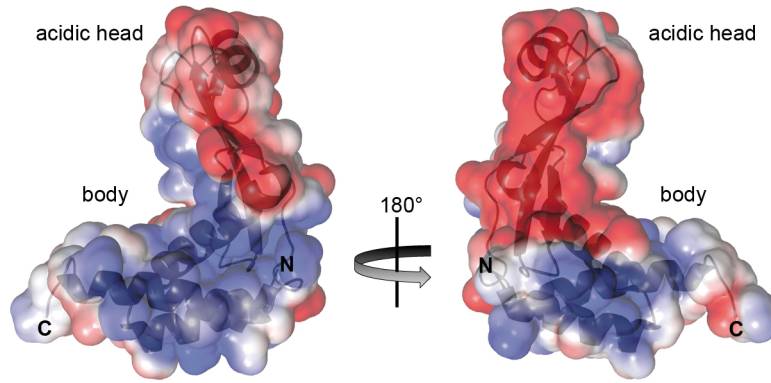

**Supplementary Figure 4: Electrostatic potential molecular surface of NusA-NTD<sup>Δ</sup>.** NusA-NTD<sup>Δ</sup> in cartoon and surface representation. The electrostatic surface potential is colored from -2 kT/e, red, to +2 kT/e, blue.

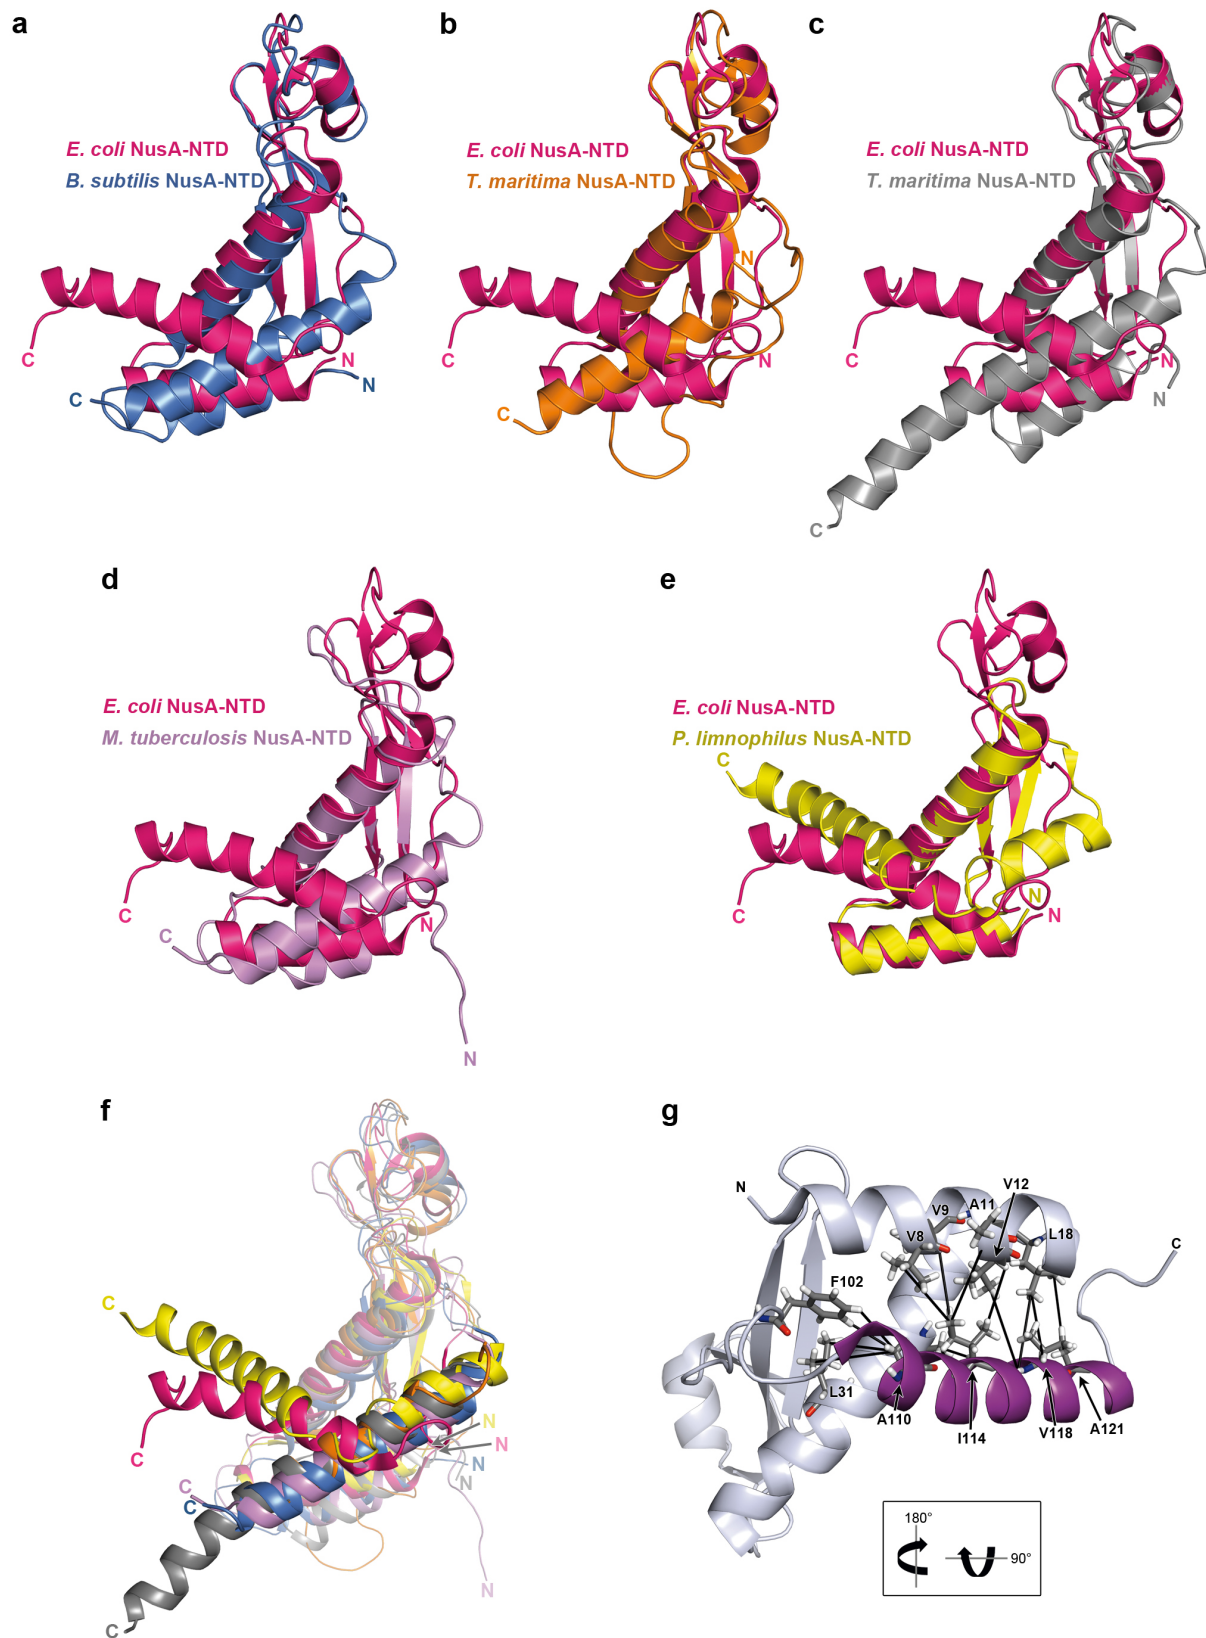

**Supplementary Figure 5: Comparison of NusA-NTD structures.** (a-e) Superposition of NusA-NTD<sup>A</sup> (pink) with (a) *Bs*NusA-NTD (blue, PDB ID: 2MT4, root mean square deviation



(r.m.s.d.) 1.8 Å), **(b)** *Tm*NusA-NTD (orange, PDB ID: 1HH2, r.m.s.d. 1.9 Å) **(c)** *Tm*NusA-NTD (grey, PDB ID: 1L2F, r.m.s.d. 1.7 Å), **(d)** *Mt*NusA-NTD (violet, PDB ID: 1K0R, r.m.s.d. 1.8 Å), and **(e)** *Pl*NusA-NTD (yellow, PDB ID: 4MTN, r.m.s.d. 1.4 Å). The linker helix was not used for the superpositions. **(f)** Superposition of NusA-NTD structures shown in **(a-e)**. The linker helix is shown in bright colors. **(g)** NOE network fixing the position of the linker helix in NusA-NTD<sup>Δ</sup> (cartoon representation, grey; the linker helix is highlighted in purple). The inset indicates how the molecule is rotated in respect to **(a)**. Residues participating in the NOE network are labeled and shown as sticks (carbon atoms, dark grey; nitrogen atoms, blue; oxygen atoms, red; hydrogen atoms, white). Unambiguously identified NOEs are shown as black lines. For clarity only one NOE is displayed per methyl group (using the corresponding methyl carbon atom as center).

## Supplementary References

1. Burmann, B. M. *et al.* A NusE:NusG Complex Links Transcription and Translation. *Science* **328**, 501-504 (2010).
